# Supplementary material
Source: Springer Nature journal article supplement (https://www.springermedizin.de/resource/supplementary/12885_2014_5043_MOESM3_ESM.pdf/9468098)
Supplement: MOESM3 [file 9468098]

**Genotype distributions of the significant SNPs in TF pathway genes across ER, PR, HR, and triple negative status.**

ORs, 95% CI and *P*-values determined with respect to the risk allele (**bold**) using logistic regression (additive model). Alleles for the positive DNA strand (UCSC annotated) are shown.

| <b>Estrogen receptor (ER) status</b> |                                               |                            |                       |                                                |                            |                       |                                                       |                       |                       |
|--------------------------------------|-----------------------------------------------|----------------------------|-----------------------|------------------------------------------------|----------------------------|-----------------------|-------------------------------------------------------|-----------------------|-----------------------|
| <b>SNP</b>                           | <b>ER-negative cases (n)/<br/>controls(n)</b> | <b>OR<br/>(95%CI)</b>      | <b><i>P</i>-value</b> | <b>ER-positive cases (n)/<br/>controls (n)</b> | <b>OR<br/>(95%CI)</b>      | <b><i>P</i>-value</b> | <b>ER-negative cases(n)/<br/>ER-positive cases(n)</b> | <b>OR<br/>(95%CI)</b> | <b><i>P</i>-value</b> |
| <b>rs12120605 (F5)</b>               |                                               |                            |                       |                                                |                            |                       |                                                       |                       |                       |
| GG                                   | 40/244                                        |                            |                       | 202/244                                        |                            |                       | 40/202                                                |                       |                       |
| TG                                   | 19/59                                         | <b>2.03</b><br>(1.14-3.61) | <b>0.016</b>          | 64/59                                          | 1.4<br>(0.97-2.04)         | 0.075                 | 19/64                                                 | 1.4<br>(0.81-2.42)    | 0.228                 |
| TT                                   | 1/1                                           |                            |                       | 4/1                                            |                            |                       | 1/4                                                   |                       |                       |
| <b>rs6427202 (F5)</b>                |                                               |                            |                       |                                                |                            |                       |                                                       |                       |                       |
| TT                                   | 12/103                                        |                            |                       | 81/103                                         |                            |                       | 12/81                                                 |                       |                       |
| CT                                   | 35/165                                        | <b>1.72</b><br>(1.12-2.64) | <b>0.014</b>          | 140/165                                        | 1.24<br>(0.97-1.58)        | 0.091                 | 35/140                                                | 1.34<br>(0.89-2.03)   | 0.164                 |
| CC                                   | 13/38                                         |                            |                       | 49/38                                          |                            |                       | 13/49                                                 |                       |                       |
| <b>rs9332542 (F5)</b>                |                                               |                            |                       |                                                |                            |                       |                                                       |                       |                       |
| GG                                   | 31/124                                        |                            |                       | 139/124                                        |                            |                       | 31/139                                                |                       |                       |
| AG                                   | 27/155                                        | <b>1.56</b><br>(1.01-2.39) | <b>0.044</b>          | 105/155                                        | 1.23<br>(0.97-1.57)        | 0.089                 | 27/105                                                | 1.23<br>(0.81-1.86)   | 0.327                 |
| AA                                   | 2/28                                          |                            |                       | 27/28                                          |                            |                       | 2/27                                                  |                       |                       |
| <b>rs6427199 (F5)</b>                |                                               |                            |                       |                                                |                            |                       |                                                       |                       |                       |
| GG                                   | 29/97                                         |                            |                       | 108/97                                         |                            |                       | 29/108                                                |                       |                       |
| AG                                   | 22/161                                        | 1.59<br>(0.99-2.54)        | 0.054                 | 121/161                                        | 1.27<br>(0.99-1.64)        | 0.063                 | 22/121                                                | 1.19<br>(0.76-1.85)   | 0.449                 |
| AA                                   | 8/48                                          |                            |                       | 39/48                                          |                            |                       | 8/39                                                  |                       |                       |
| <b>rs3093261 (F10)</b>               |                                               |                            |                       |                                                |                            |                       |                                                       |                       |                       |
| CC                                   | 10/118                                        |                            |                       | 88/118                                         |                            |                       | 10/88                                                 |                       |                       |
| TC                                   | 39/137                                        | <b>1.62</b><br>(1.09-2.40) | <b>0.018</b>          | 123/137                                        | <b>1.26</b><br>(1.00-1.58) | <b>0.048</b>          | 39/123                                                | 1.26<br>(0.85-1.86)   | 0.254                 |
| TT                                   | 11/51                                         |                            |                       | 61/51                                          |                            |                       | 11/61                                                 |                       |                       |
| <b>rs2069948 (EPCR)</b>              |                                               |                            |                       |                                                |                            |                       |                                                       |                       |                       |
| TT                                   | 19/118                                        |                            |                       | 78/118                                         |                            |                       | 19/78                                                 |                       |                       |
| TC                                   | 33/125                                        | 1.00<br>(0.68-1.46)        | 0.998                 | 129/125                                        | <b>1.27</b><br>(1.01-1.58) | <b>0.038</b>          | 33/129                                                | 0.77<br>(0.87-1.93)   | 0.208                 |
| CC                                   | 8/62                                          |                            |                       | 63/62                                          |                            |                       | 8/63                                                  |                       |                       |

**Progesterone receptor (PR) status**

| SNP                     | PR-negative cases (n)/<br>controls(n) | OR<br>(95%CI)              | P-value      | PR-positive cases (n)/<br>controls (n) | OR<br>(95%CI)              | P-value      | PR-negative cases(n)/<br>PR-positive cases(n) | OR<br>(95%CI)              | P-value      |
|-------------------------|---------------------------------------|----------------------------|--------------|----------------------------------------|----------------------------|--------------|-----------------------------------------------|----------------------------|--------------|
| <b>rs12120605 (F5)</b>  |                                       |                            |              |                                        |                            |              |                                               |                            |              |
| GG                      | 67/244                                |                            |              | 175/244                                |                            |              | 67/175                                        |                            |              |
| TG                      | 30/59                                 | <b>1.96</b><br>(1.21-3.16) | <b>0.006</b> | 53/59                                  | 1.33<br>(0.90-1.97)        | 0.150        | 30/53                                         | 1.44<br>(0.90-2.31)        | 0.131        |
| TT                      | 2/1                                   |                            |              | 3/1                                    |                            |              | 2/3                                           |                            |              |
| <b>rs6427202 (F5)</b>   |                                       |                            |              |                                        |                            |              |                                               |                            |              |
| TT                      | 22/103                                |                            |              | 71/103                                 |                            |              | 22/71                                         |                            |              |
| CT                      | 57/165                                | <b>1.57</b><br>(1.11-2.24) | <b>0.011</b> | 118/165                                | 1.22<br>(0.94-1.58)        | 0.135        | 57/118                                        | 1.26<br>(0.89-1.78)        | 0.197        |
| CC                      | 20/38                                 |                            |              | 42/38                                  |                            |              | 20/42                                         |                            |              |
| <b>rs9332542 (F5)</b>   |                                       |                            |              |                                        |                            |              |                                               |                            |              |
| GG                      | 53/124                                |                            |              | 117/124                                |                            |              | 53/117                                        |                            |              |
| AG                      | 39/155                                | <b>1.73</b><br>(1.21-2.47) | <b>0.003</b> | 93/155                                 | 1.14<br>(0.89-1.47)        | 0.296        | 39/93                                         | <b>1.45</b><br>(1.02-2.06) | <b>0.039</b> |
| AA                      | 6/28                                  |                            |              | 23/28                                  |                            |              | 6/23                                          |                            |              |
| <b>rs6427199 (F5)</b>   |                                       |                            |              |                                        |                            |              |                                               |                            |              |
| GG                      | 49/97                                 |                            |              | 88/97                                  |                            |              | 49/88                                         |                            |              |
| AG                      | 39/161                                | <b>1.55</b><br>(1.06-2.27) | <b>0.023</b> | 104/161                                | 1.25<br>(0.95-1.63)        | 0.107        | 39/104                                        | 1.2<br>(0.83-1.75)         | 0.330        |
| AA                      | 10/48                                 |                            |              | 37/48                                  |                            |              | 10/37                                         |                            |              |
| <b>rs3093261 (F10)</b>  |                                       |                            |              |                                        |                            |              |                                               |                            |              |
| CC                      | 23/118                                |                            |              | 75/118                                 |                            |              | 23/75                                         |                            |              |
| TC                      | 57/137                                | <b>1.44</b><br>(1.04-1.99) | <b>0.028</b> | 105/137                                | <b>1.27</b><br>(1.00-1.61) | <b>0.048</b> | 57/105                                        | 1.11<br>(0.80-1.55)        | 0.527        |
| TT                      | 19/51                                 |                            |              | 53/51                                  |                            |              | 19/53                                         |                            |              |
| <b>rs2069948 (EPCR)</b> |                                       |                            |              |                                        |                            |              |                                               |                            |              |
| TT                      | 32/118                                |                            |              | 65/118                                 |                            |              | 32/65                                         |                            |              |
| TC                      | 52/125                                | 1.02<br>(0.75-1.40)        | 0.888        | 110/125                                | <b>1.30</b><br>(1.03-1.65) | <b>0.025</b> | 52/110                                        | 0.77<br>(0.55-1.07)        | 0.120        |
| CC                      | 15/62                                 |                            |              | 56/62                                  |                            |              | 15/56                                         |                            |              |

**Hormone receptor negative status (ER negative/PR negative)**

| SNP                     | ER/PR negative cases(n)/controls(n) | OR (95%CI)                 | P-value      | ER/PR negative cases(n)/other cases(n)* | OR (95%CI)          | P-value |
|-------------------------|-------------------------------------|----------------------------|--------------|-----------------------------------------|---------------------|---------|
| <b>rs12120605 (F5)</b>  |                                     |                            |              |                                         |                     |         |
| GG                      | 39/244                              |                            |              | 39/203                                  |                     |         |
| TG                      | 18/59                               | <b>1.99</b><br>(1.11-3.56) | <b>0.021</b> | 18/65                                   | 1.36<br>(0.78-2.37) | 0.275   |
| TT                      | 1/1                                 |                            |              | 1/4                                     |                     |         |
| <b>rs6427202 (F5)</b>   |                                     |                            |              |                                         |                     |         |
| TT                      | 11/103                              |                            |              | 11/82                                   |                     |         |
| CT                      | 35/165                              | <b>1.73</b><br>(1.12-2.67) | <b>0.014</b> | 35/140                                  | 1.34<br>(0.88-2.04) | 0.171   |
| CC                      | 12/38                               |                            |              | 12/50                                   |                     |         |
| <b>rs9332542 (F5)</b>   |                                     |                            |              |                                         |                     |         |
| GG                      | 30/124                              |                            |              | 30/140                                  |                     |         |
| AG                      | 26/155                              | 1.54<br>(0.99-2.37)        | 0.053        | 26/106                                  | 1.18<br>(0.75-1.86) | 0.463   |
| AA                      | 2/28                                |                            |              | 2/27                                    |                     |         |
| <b>rs6427199 (F5)</b>   |                                     |                            |              |                                         |                     |         |
| GG                      | 28/97                               |                            |              | 28/109                                  |                     |         |
| AG                      | 21/161                              | 1.58<br>(0.98-2.55)        | 0.058        | 21/122                                  | 1.21<br>(0.80-1.84) | 0.369   |
| AA                      | 8/48                                |                            |              | 8/39                                    |                     |         |
| <b>rs3093261 (F10)</b>  |                                     |                            |              |                                         |                     |         |
| CC                      | 10/118                              |                            |              | 10/88                                   |                     |         |
| TC                      | 37/137                              | <b>1.61</b><br>(1.08-2.41) | <b>0.020</b> | 37/125                                  | 1.26<br>(0.84-1.87) | 0.261   |
| TT                      | 11/51                               |                            |              | 11/61                                   |                     |         |
| <b>rs2069948 (EPCR)</b> |                                     |                            |              |                                         |                     |         |
| TT                      | 18/118                              | 1.02<br>(0.70-1.50)        | 0.915        | 18/79                                   | 1.26<br>(0.84-1.88) | 0.269   |
| TC                      | 32/125                              |                            |              | 32/130                                  |                     |         |
| CC                      | 8/62                                |                            |              | 8/63                                    |                     |         |

\*Cases with either ER negative/PR positive, ER positive/PR negative or ER positive/PR positive status

**Triple negative status (ER negative/PR negative/HER2 negative)**

| SNP                     | ER/PR/HER2 negative cases(n)/<br>controls(n) | OR<br>(95%CI)              | P-value      | ER/PR negative cases(n)/<br>other cases(n)* | OR<br>(95%CI)       | P-value |
|-------------------------|----------------------------------------------|----------------------------|--------------|---------------------------------------------|---------------------|---------|
| <b>rs12120605 (F5)</b>  |                                              |                            |              |                                             |                     |         |
| GG                      | 33/244                                       |                            |              | 33/209                                      |                     |         |
| TG                      | 16/59                                        | <b>2.11</b><br>(1.14-3.89) | <b>0.017</b> | 16/67                                       | 1.44<br>(0.81-2.58) | 0.216   |
| TT                      | 1/1                                          |                            |              | 1/4                                         |                     |         |
| <b>rs6427202 (F5)</b>   |                                              |                            |              |                                             |                     |         |
| TT                      | 9/103                                        |                            |              | 9/84                                        |                     |         |
| CT                      | 29/165                                       | <b>1.90</b><br>(1.19-3.02) | <b>0.007</b> | 29/146                                      | 1.48<br>(0.95-2.32) | 0.084   |
| CC                      | 12/38                                        |                            |              | 12/50                                       |                     |         |
| <b>rs9332542 (F5)</b>   |                                              |                            |              |                                             |                     |         |
| GG                      | 28/124                                       |                            |              | 28/142                                      |                     |         |
| AG                      | 21/155                                       | <b>1.68</b><br>(1.05-2.68) | <b>0.032</b> | 21/111                                      | 1.41<br>(0.86-2.31) | 0.179   |
| AA                      | 1/28                                         |                            |              | 1/28                                        |                     |         |
| <b>rs6427199 (F5)</b>   |                                              |                            |              |                                             |                     |         |
| GG                      | 26/97                                        |                            |              | 26/111                                      |                     |         |
| AG                      | 16/161                                       | <b>1.88</b><br>(1.11-3.19) | <b>0.018</b> | 16/127                                      | 1.33<br>(0.84-2.09) | 0.223   |
| AA                      | 7/48                                         |                            |              | 7/40                                        |                     |         |
| <b>rs3093261 (F10)</b>  |                                              |                            |              |                                             |                     |         |
| CC                      | 10/118                                       |                            |              | 10/88                                       |                     |         |
| TC                      | 32/137                                       | 1.44<br>(0.94-2.19)        | 0.095        | 32/130                                      | 1.09<br>(0.72-1.67) | 0.680   |
| TT                      | 8/51                                         |                            |              | 8/64                                        |                     |         |
| <b>rs2069948 (EPCR)</b> |                                              |                            |              |                                             |                     |         |
| TT                      | 16/118                                       |                            |              | 16/81                                       |                     |         |
| TC                      | 28/125                                       | 1.03<br>(0.68-1.55)        | 0.883        | 28/134                                      | 1.33<br>(0.87-2.06) | 0.191   |
| CC                      | 6/62                                         |                            |              | 6/65                                        |                     |         |

\*Cases with either ER negative/PR positive/HER2 positive, ER negative/PR positive/HER2 negative, ER positive/PR negative/HER2 positive, ER positive/PR negative/HER2 negative, ER positive/PR positive/Her2 positive, ER positive/PR positive/Her2 negative, ER negative/PR negative/HER2 positive status.
